# Supplementary material for: Prevalence and Impact of Atrial Fibrillation in Hospitalized Patients with COVID-19: A Systematic Review and Meta-Analysis
Source: MDPI journal article supplement (doi:10.3390/jcm10112490), 2021-06-04
Supplement: s1 [file s1]

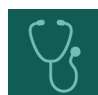

Supplementary Materials

# Prevalence and Impact of Atrial Fibrillation in Hospitalised patients with COVID-19: A Systematic Review and Meta-Analysis

**Supplementary Table S1.** – Full Search Strategy.

| PubMed                                                                                                                                                                                                                                                                                                  |
|---------------------------------------------------------------------------------------------------------------------------------------------------------------------------------------------------------------------------------------------------------------------------------------------------------|
| #1 "severe acute respiratory syndrome coronavirus 2"[Supplementary Concept] OR "severe acute respiratory syndrome coronavirus 2"[All Fields] OR "ncov"[All Fields] OR "2019-nCoV"[All Fields] OR "COVID-19"[All Fields] OR "SARS-CoV-2"[All Fields] OR ((coronavirus[All Fields] OR "cov"[All Fields])) |
| #2 "sars-cov-2"[MeSH Terms] OR "sars-cov-2"[All Fields] OR "sars cov 2"[All Fields]                                                                                                                                                                                                                     |
| #3 "Covid-19"[All Fields] OR "Covid"[All Fields]                                                                                                                                                                                                                                                        |
| #4 #1 OR #2 OR #3                                                                                                                                                                                                                                                                                       |
| #5 ("atrial fibrillation"[MeSH Terms] OR ("atrial"[All Fields] AND "fibrillation"[All Fields])) OR "atrial fibrillation"[All Fields]                                                                                                                                                                    |
| #6 #4 AND #5                                                                                                                                                                                                                                                                                            |
| EMBASE                                                                                                                                                                                                                                                                                                  |
| #1 'coronavirus disease 2019'/exp                                                                                                                                                                                                                                                                       |
| #2 Covid                                                                                                                                                                                                                                                                                                |
| #3 'severe acute respiratory syndrome coronavirus 2'                                                                                                                                                                                                                                                    |
| #4 'sars-cov-2'                                                                                                                                                                                                                                                                                         |
| #5 #1 OR #2 OR #3 OR #4                                                                                                                                                                                                                                                                                 |
| #6 'atrial fibrillation'                                                                                                                                                                                                                                                                                |
| #7 #5 AND #6                                                                                                                                                                                                                                                                                            |

**Supplementary Table S2.** – Bias Assessment – NOS for prevalence of AF.

| Study                        | Selection (2) | Comparability (1) | Outcome (2) | Total (5) |
|------------------------------|---------------|-------------------|-------------|-----------|
| Abe 2020 <sup>*,**</sup>     | 2             | 0                 | 1           | 3         |
| Angeli 2020 <sup>*,***</sup> | 1             | 1                 | 1           | 3         |
| Bhatla 2020                  | 2             | 1                 | 2           | 5         |
| Chen 2020 <sup>*,#,***</sup> | 0             | 1                 | 1           | 2         |
| Colon 2020                   | 2             | 1                 | 2           | 5         |
| Coromilas 2021               | 2             | 1                 | 2           | 5         |
| D'Andrea 2020 <sup>*</sup>   | 1             | 1                 | 1           | 3         |
| Denegri 2020 <sup>*</sup>    | 2             | 1                 | 1           | 4         |
| Harrison 2020 <sup>*,a</sup> | 1             | 1                 | 1           | 3         |
| García-Granja 2021           | 2             | 1                 | 2           | 5         |
| Kelesoglu 2020               | 2             | 1                 | 2           | 5         |
| Lanza 2020 <sup>**</sup>     | 2             | 0                 | 2           | 4         |
| Li 2020 <sup>*</sup>         | 2             | 1                 | 1           | 4         |
| Linschoten 2020              | 2             | 1                 | 1           | 4         |
| Maeda 2020                   | 2             | 1                 | 2           | 5         |
| Mountantonakis 2021          | 2             | 1                 | 2           | 5         |
| Musikantow 2021              | 2             | 1                 | 2           | 5         |
| Pardo Sanz 2020              | 2             | 1                 | 2           | 5         |

|                                |   |   |   |   |
|--------------------------------|---|---|---|---|
| Peltzer 2020                   | 2 | 1 | 2 | 5 |
| Piroth 2020*                   | 2 | 1 | 1 | 4 |
| Poterucha 2020*,**             | 2 | 0 | 1 | 3 |
| Rav-Acha 2020*                 | 2 | 1 | 1 | 4 |
| Russo 2020                     | 2 | 1 | 2 | 5 |
| Sala 2020 <sup>a,b</sup>       | 1 | 1 | 1 | 3 |
| Santoro 2020*, <sup>b</sup>    | 1 | 1 | 1 | 3 |
| Spinoni 2021                   | 1 | 1 | 1 | 3 |
| Vee 2020                       | 2 | 1 | 0 | 3 |
| Wang 2020*                     | 2 | 1 | 1 | 4 |
| Yenercag 2020*, <sup>b</sup>   | 1 | 1 | 1 | 2 |
| Wetterslev 2021 <sup>#,a</sup> | 1 | 1 | 1 | 3 |
| Zylla 2021*,**                 | 2 | 0 | 1 | 3 |

**Legend:** \*Missing/incomplete reporting of baseline characteristics; \*\*Some patients were excluded from the main analysis due to incomplete data; \*\*\*Enrolled less than 100 patients; #Included only critical/severe patients; <sup>a</sup>Potential bias in the definition of AF during COVID-19; <sup>b</sup>Potential selection bias; NOS= Newcastle-Ottawa Scale.

**Supplementary Table S3.** - Bias Assessment – NOS for outcomes according to AF.

| Study               | Selection (4) | Comparability (2) | Outcome (3) | Total (9) |
|---------------------|---------------|-------------------|-------------|-----------|
| Bhatla 2020         | 4             | 1                 | 3           | 8         |
| Denegri 2020*       | 3             | 0                 | 3           | 6         |
| García-Granja 2021  | 4             | 1                 | 3           | 8         |
| Kelesoglu 2021      | 4             | 2                 | 3           | 9         |
| Lanza 2020          | 3             | 1                 | 3           | 7         |
| Mountantonakis 2021 | 4             | 2                 | 3           | 9         |
| Musikantow 2021     | 4             | 2                 | 3           | 9         |
| Pardo Sanz 2020     | 4             | 2                 | 3           | 9         |
| Peltzer 2020        | 4             | 2                 | 3           | 9         |
| Poterucha 2020      | 3             | 1                 | 3           | 7         |
| Rav-Acha 2020       | 4             | 1                 | 3           | 8         |
| Russo 2020          | 4             | 2                 | 3           | 9         |
| Spinoni 2021**      | 2             | 0                 | 3           | 5         |
| Zylla 2021          | 4             | 0                 | 2           | 7         |

**Legend:** \*Ascertainment of endpoints potentially biased; \*\*Incomplete/Missing baseline characteristics NOS= Newcastle-Ottawa Scale.

**Supplementary Table S4.** – Sensitivity Analysis for Pooled Prevalence of AF according to different analysis methods.

| Method                   | Prevalence | 95%CI     | Tau   | Tau <sup>2</sup> | I <sup>2</sup> |
|--------------------------|------------|-----------|-------|------------------|----------------|
| IV, Logit Transformation | 8.3%       | 6.6-10.5% | 0.660 | 0.436            | 99.3%          |
| IV, FT                   | 8.7%       | 6.7-10.9% | 0.099 | 0.010            | 99.5%          |

Legend: FT: Freeman-Tukey Double Arcsine Transformation; IV=Inverse Variance.

**Supplementary Table S5.** – Pre-specified subgroup analysis for AF prevalence.

| Subgroups                                                       | N° Studies | Pooled Prevalence | 95% CI    | I <sup>2</sup> |
|-----------------------------------------------------------------|------------|-------------------|-----------|----------------|
| <i>Geographical Location (p for subgroup differences=0.016)</i> |            |                   |           |                |
| North America                                                   | 9          | 7.5%              | 5.0-11.0% | 99.7%          |
| Europe                                                          | 13         | 11.3%             | 8.2-15.4% | 91.7%          |
| Asia/Other                                                      | 9          | 5.3%              | 3.4-8.0%  | 95.8%          |
| <i>Study Type (p for subgroup differences=0.064)</i>            |            |                   |           |                |
| Retrospective                                                   | 25         | 8.4%              | 6.3-11.2% | 99.5%          |
| Prospective                                                     | 6          | 5.8%              | 4.4-7.6%  | 41.2%          |

|                                                        |    |      |           |       |
|--------------------------------------------------------|----|------|-----------|-------|
| <i>Risk of Bias (p for subgroup differences=0.557)</i> |    |      |           |       |
| <b>Low Risk</b>                                        | 18 | 8.5% | 6.7-10.7% | 97.0% |
| <b>High Risk</b>                                       | 13 | 7.1% | 4.2-11.8% | 98.4% |

**Legend:** AF= Atrial Fibrillation; CI= Confidence Interval.

**Supplementary Table S6.** – Univariate and Multivariable Meta-Regression\* Analysis for All-Cause Mortality.

| <b>Variable</b>               | <b>Coefficient</b> | <b>Standard Error</b> | <b>Lower 95 CI</b> | <b>Upper 95 CI</b> | <b>P</b> | <b>R<sup>2</sup></b> |
|-------------------------------|--------------------|-----------------------|--------------------|--------------------|----------|----------------------|
| <i>Univariate Analysis</i>    |                    |                       |                    |                    |          |                      |
| <b>Age</b>                    | -0.034             | 0.041                 | -0.123             | 0.056              | 0.424    | 0.040                |
| <b>Female Sex</b>             | -0.254             | 4.190                 | -9.476             | 8.967              | 0.953    | 0.000                |
| <b>Hypertension</b>           | -1.118             | 1.867                 | -5.225             | 2.989              | 0.561    | 0.000                |
| <b>Diabetes</b>               | -3.552             | 2.152                 | -8.287             | 1.184              | 0.127    | 0.114                |
| <b>Geographical Location</b>  |                    |                       |                    |                    | 0.852    | 0.000                |
| Europe (ref.)                 | -                  | -                     | -                  | -                  | -        |                      |
| North America                 | -0.192             | 0.417                 | -1.110             | 0.727              | 0.655    |                      |
| Asia/Other                    | 0.131              | 0.695                 | -1.399             | 1.662              | 0.854    |                      |
| <i>Multivariable Analysis</i> |                    |                       |                    |                    | 0.547    |                      |
| <b>Age</b>                    | -0.027             | 0.058                 | -0.164             | 0.110              | 0.654    |                      |
| <b>Hypertension</b>           | 4.222              | 4.435                 | -6.264             | 14.708             | 0.373    |                      |
| <b>Diabetes</b>               | -10.709            | 7.372                 | -28.141            | 6.723              | 0.190    | 0.000                |
| <b>Geographical Location</b>  |                    |                       |                    |                    |          |                      |
| Europe (ref.)                 | -                  | -                     | -                  | -                  | -        |                      |
| North America                 | 1.085              | 1.232                 | -1.828             | 3.999              | 0.408    |                      |
| Asia/Other                    | 0.786              | 1.532                 | -2.837             | 4.409              | 0.624    |                      |

**Legend:** \*Restricted Maximum Likelihood; Knapp-Hartung method; AF= Atrial Fibrillation; CI= Confidence Interval.

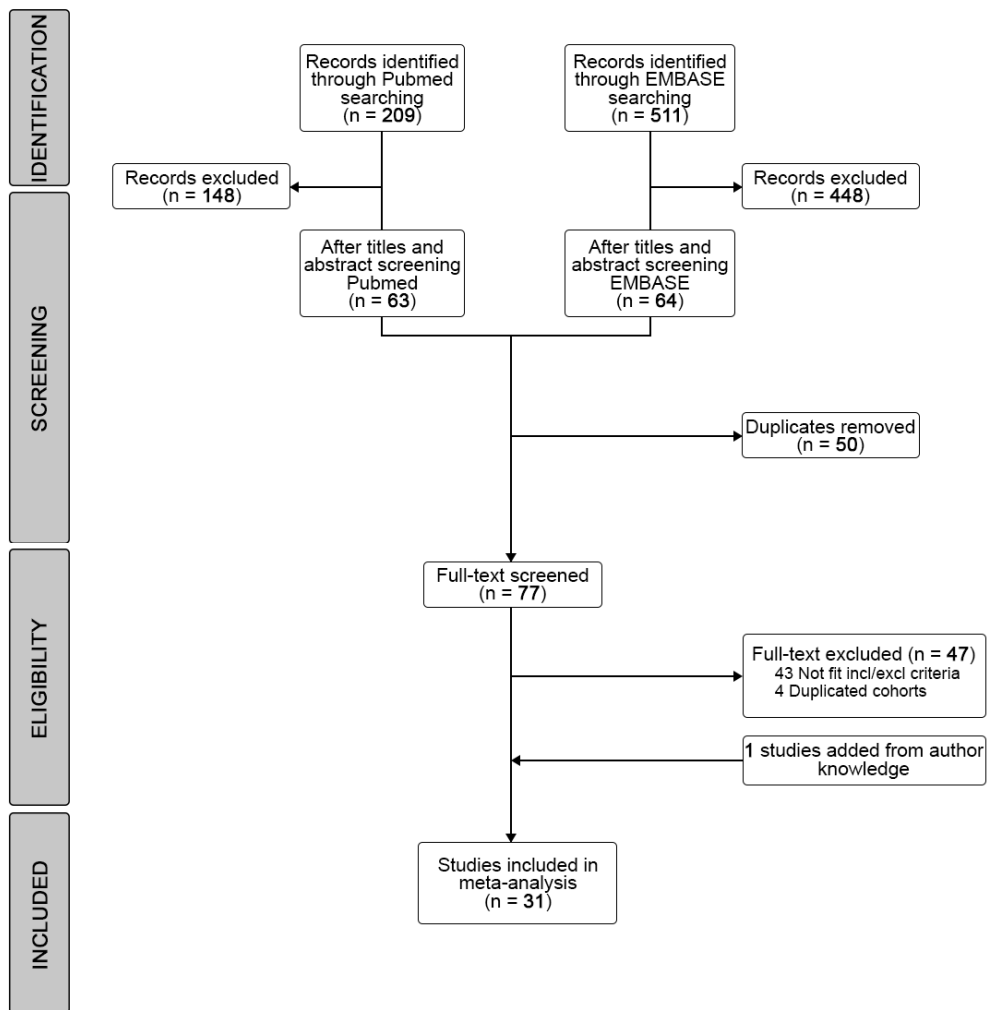

**Supplementary Figure S1.** – PRISMA Flow-Chart of the Study.

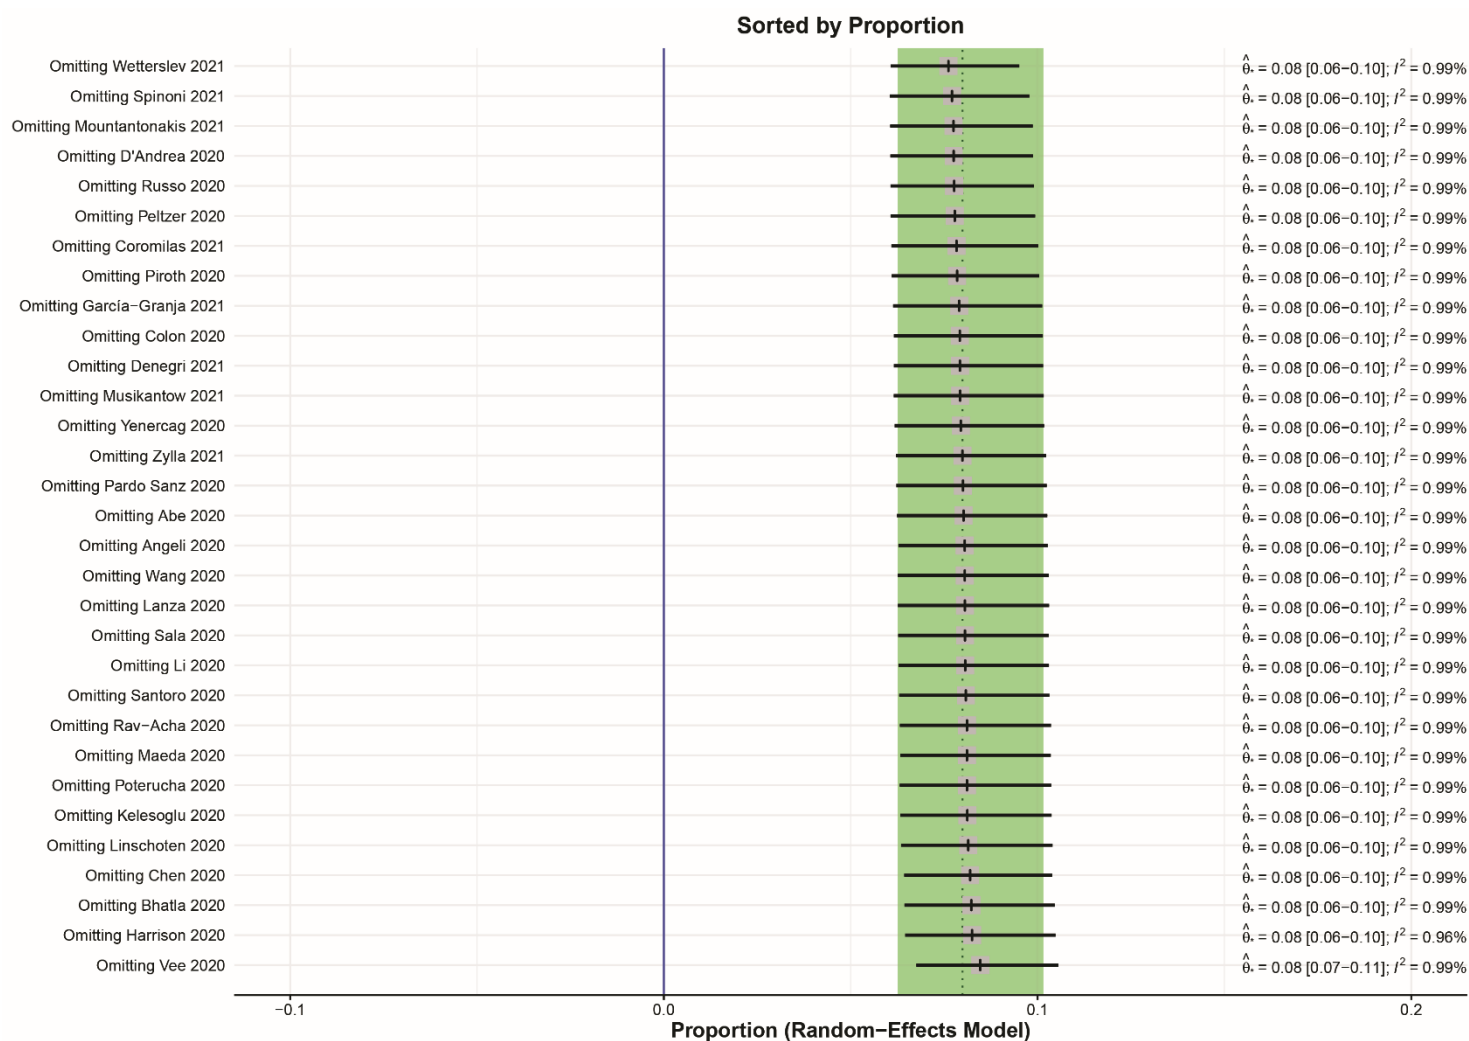

**Supplementary Figure S2.** – Leave one out analysis for AF Prevalence. Legend: AF= Atrial Fibrillation.

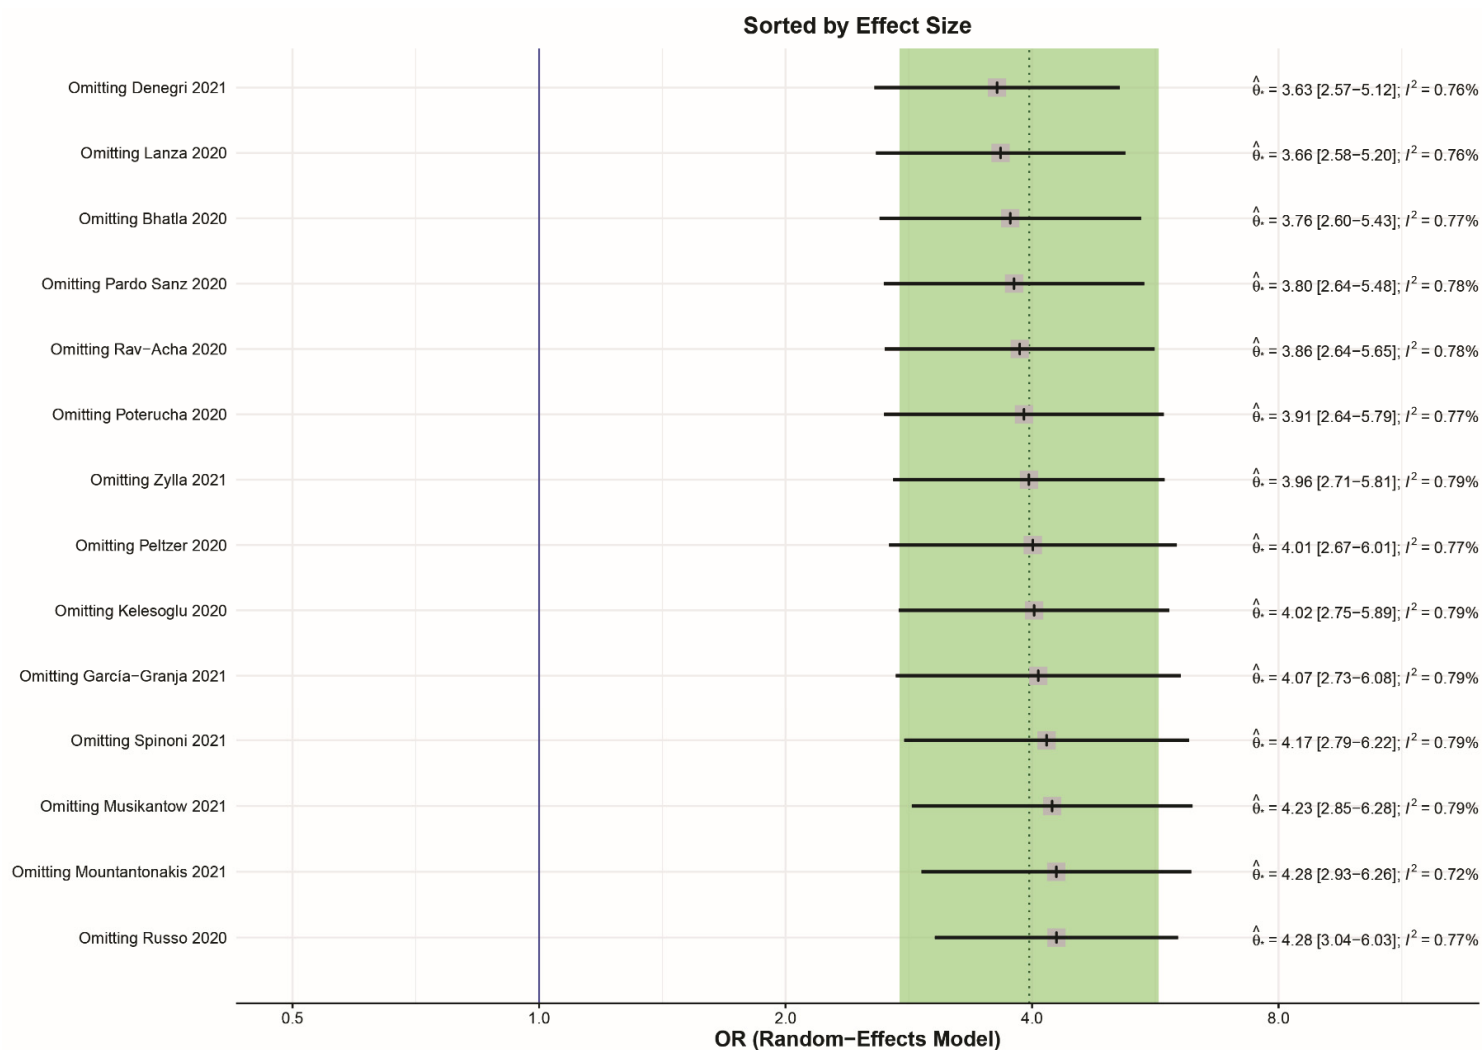

**Supplementary Figure S3.** – Leave one out analysis for All-Cause Death according to AF diagnosis. Legend: AF= Atrial Fibrillation; OR= Odds Ratio.

**Figure S4** – Subgroup analysis according to the definition of outcome (In-hospital mortality vs. 30-days mortality)

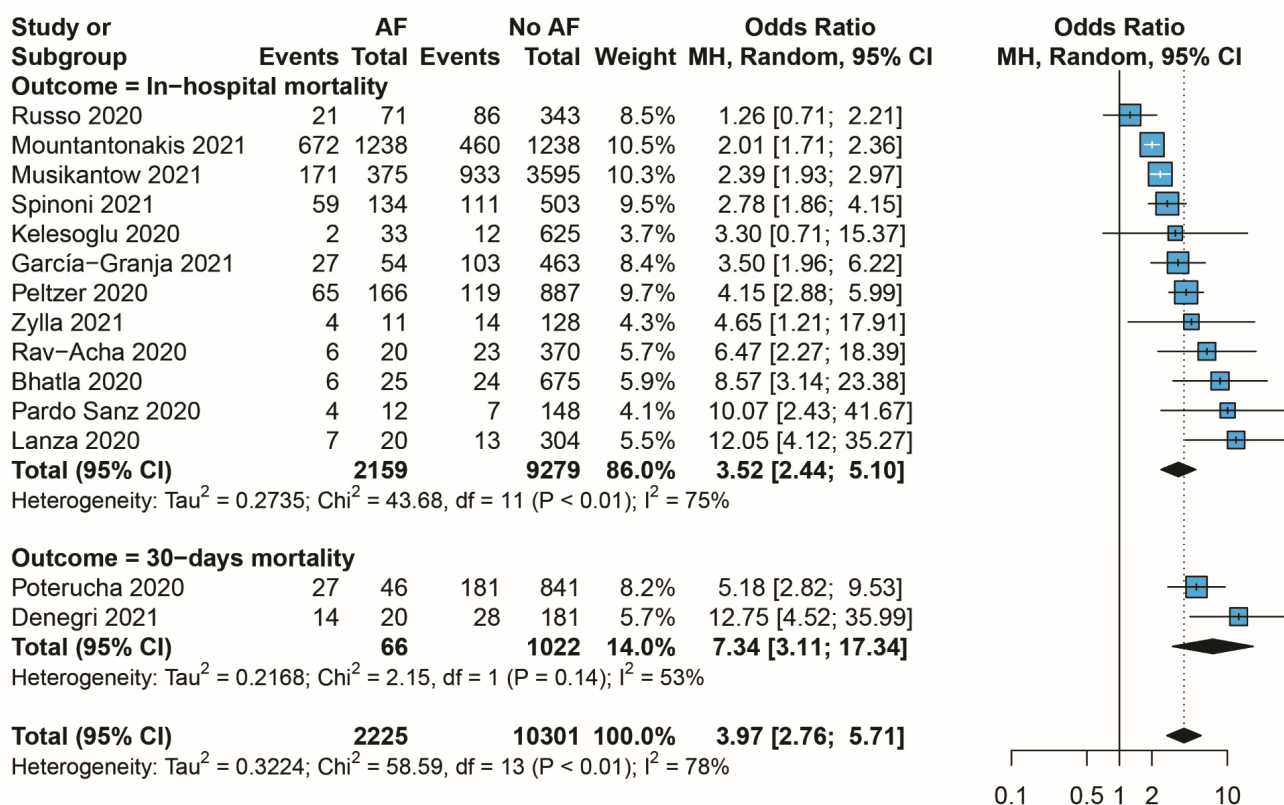

**Supplementary Figure S4.** – Subgroup analysis according to the definition of outcome (In-hospital mortality vs. 30-days mortality). **Legend:** AF= Atrial Fibrillation; CI= Confidence Interval; MH= Mantel-Haenszel.

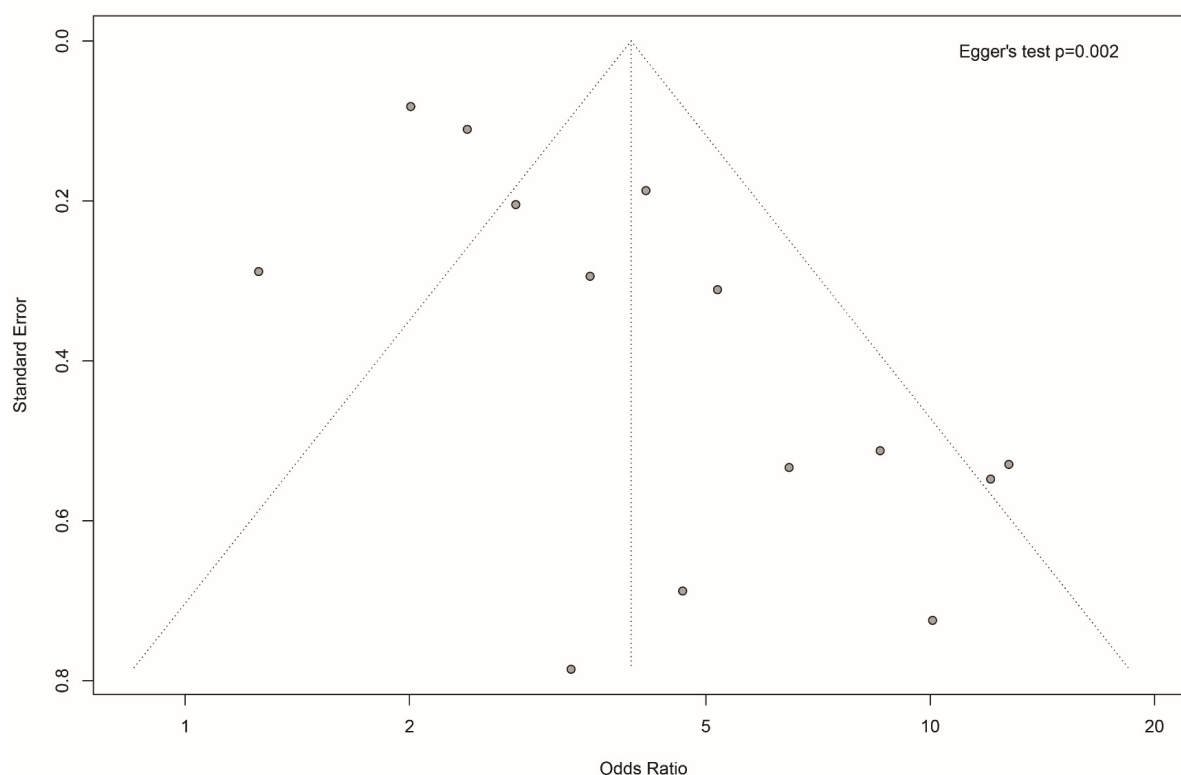

**Supplementary Figure S5.** – Publication Bias for all-cause death according to AF status.

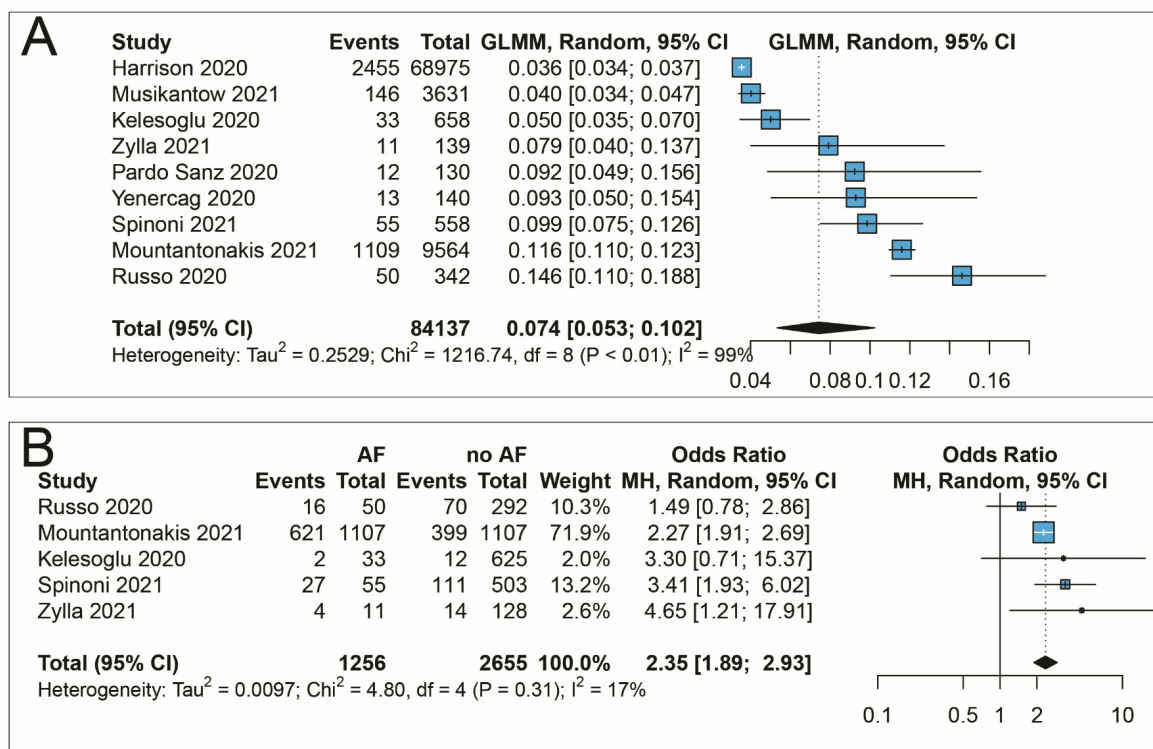

**Supplementary Figure S6. – Sensitivity analysis on New-Onset AF. Legend:** Panel A: Pooled prevalence of New-Onset AF; Panel B: All-cause death according to New-Onset AF status; AF= Atrial Fibrillation; CI= Confidence Interval; GLMM= General Linear Mixed Model; MH= Mantel-Haenszel.
